# Supplementary material
Source: PubMed Central journal article supplement (PMC4201268)
Supplement: supp_114.217331_jpet217331_suppl_data.pdf [file supp_114.217331_jpet217331_suppl_data.pdf]

**Supplemental Information: Hemorrhagic shock-induced intestinal barrier dysfunction**

**Remediation of Hemorrhagic Shock-Induced Intestinal Barrier Dysfunction by Treatment with  
Diphenyldihaloketones**

Vivek R Yadav, Alamdar Hussain, Kaustuv Sahoo, and Vibhudutta Awasthi

Department of Pharmaceutical Sciences, University of Oklahoma Health Science Center, Oklahoma City,  
OK, USA

---

**Supplemental Information: Hemorrhagic shock-induced intestinal barrier dysfunction**

**Fig. S1:** Microscopic pictures of ileal tissue from rats subjected to hemorrhagic shock and treated with EF24 or CLEFMA (0.4 mg/Kg bodyweight). The slices of ileum were stained with hematoxylin and eosin.

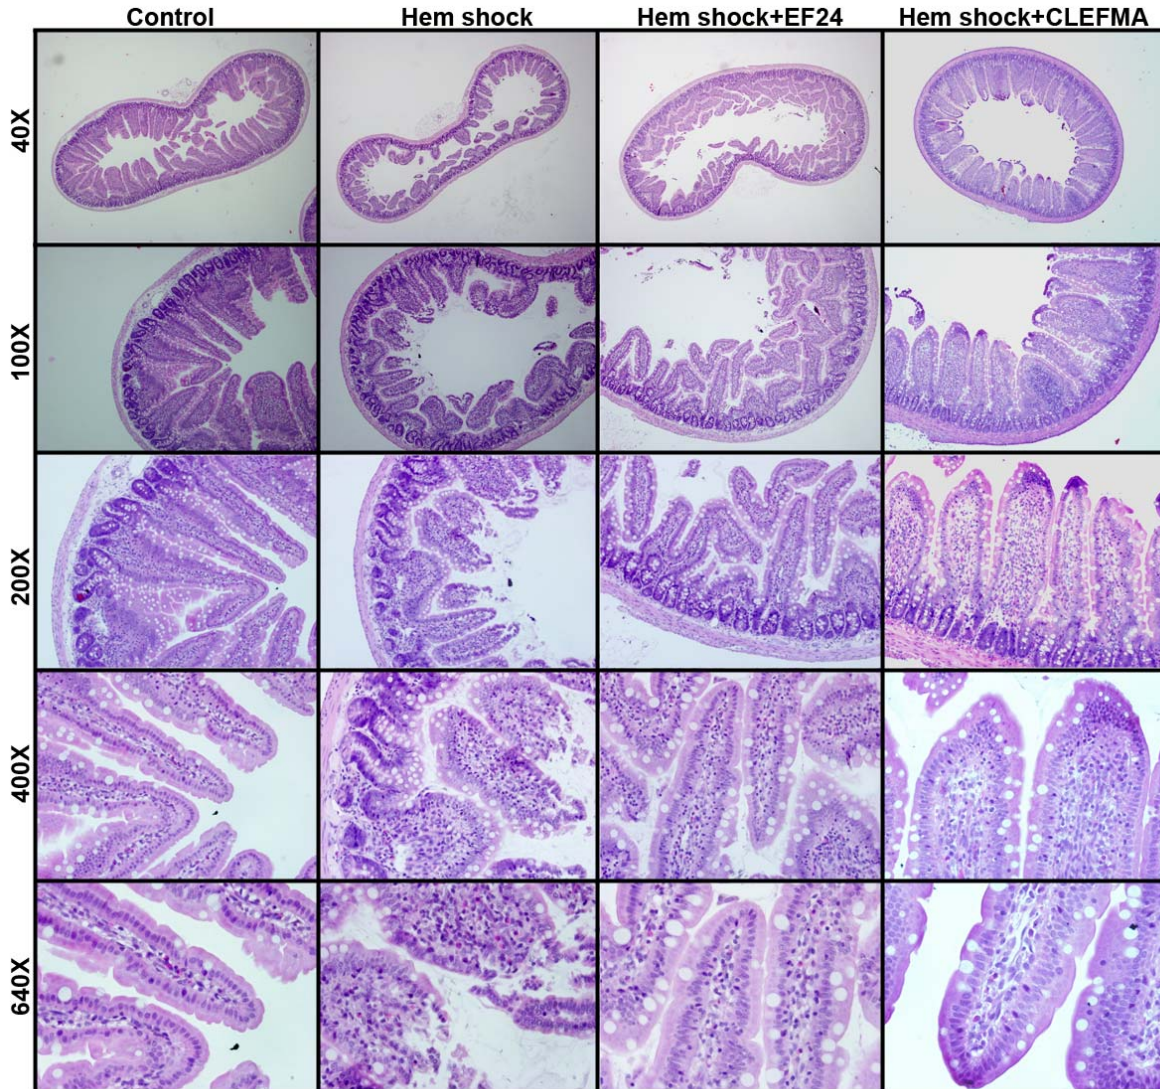

**Supplemental Information: Hemorrhagic shock-induced intestinal barrier dysfunction**

**Fig. S2:** IL-8 or GRO/CINC-1 estimation in rat ileal tissue. IL-8 in rat ileum was estimated by ELISA using a kit supplied by Enzo Life Sciences (Farmingdale, NY). Manufacturer's instructions were followed, and the IL-8 concentration was expressed in pg/mL.

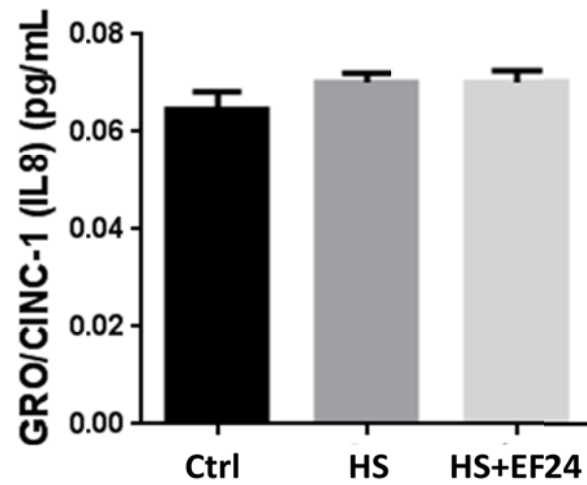

## Supplemental Information: Hemorrhagic shock-induced intestinal barrier dysfunction

**Fig. S3:** Gamma camera images of a rat injected with Tc-99m-EF24. The labeling procedure for Tc-99m-EF24 has been described elsewhere (22). The rat was injected with approximately 74 MBq of Tc-99m-EF24 and imaged in a NanoSPECT system (Bioscan, Washington DC). A dynamic image acquisition of Tc-99m-EF24 kinetics in the first 30 min of intravenous administration was followed by static images (at 0.5, 2, 4, and 6 h). The images are representative of three identically imaged rats.

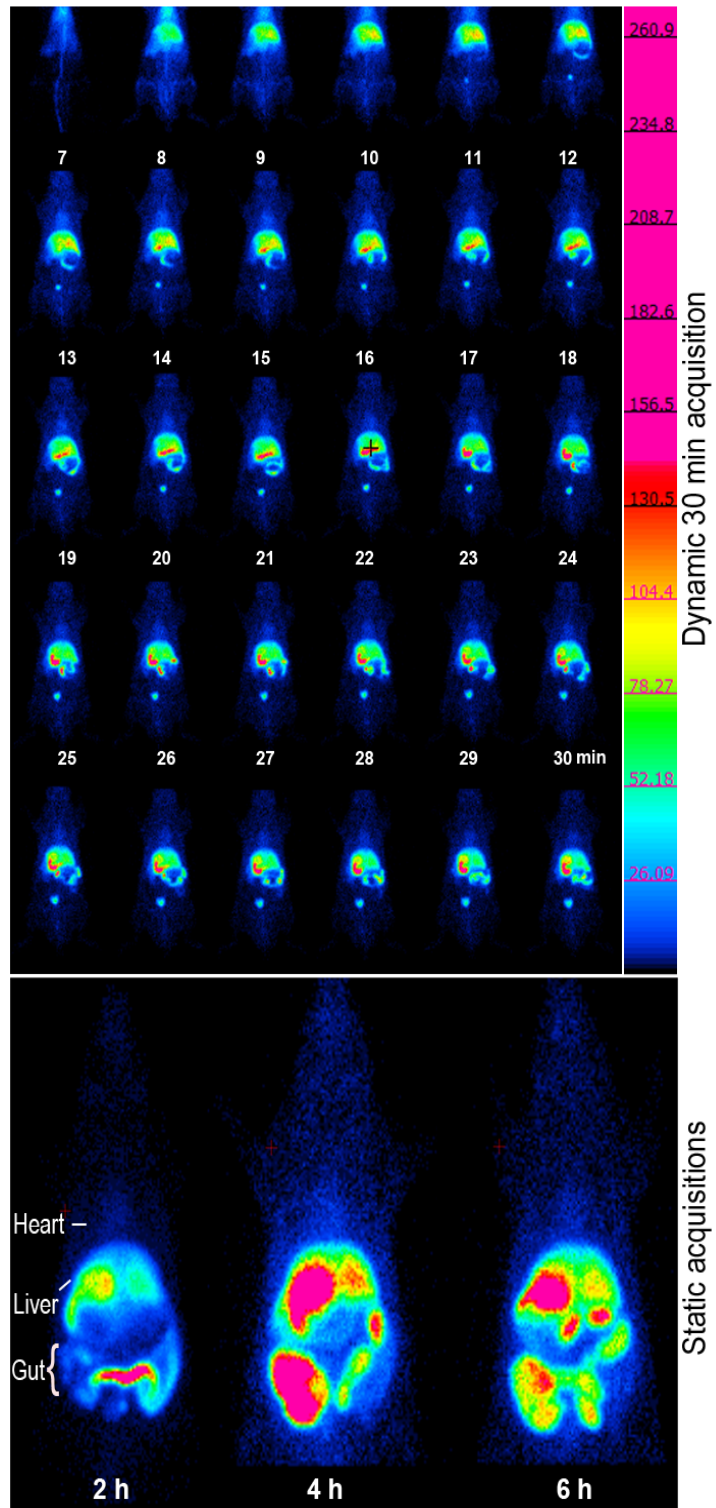

## Supplemental Information: Hemorrhagic shock-induced intestinal barrier dysfunction

**Table S1:** Sequences of primers used in RT-PCR analyses. The primers for RT-PCR in rat ileal tissues were obtained from [www.realtimeprimers.com](http://www.realtimeprimers.com).

| Gene                                     | 5'-Forward-3'        | 5'-Reverse-3'        |
|------------------------------------------|----------------------|----------------------|
| Zonula Occludens-1                       | TGTCCAGAGTCTCGGAAAAG | GACGATCATCATGCAAATCA |
| Zonula Occludens-2                       | GCATGAGGAGAGCATAAGGA | GCAGAGAGGTTTACTTGA   |
| Zonula Occludens-3                       | CAGGAAGTCAAGGCTGTCAT | GGTGTCTTCGTAGTCGCTGT |
| Occludin                                 | TGGTCTCTACGTGGACCAAT | TTAGGGGGCTGTTCATCATA |
| Claudin-1                                | GCCCCAATGGAAGATTTACT | TAAGCACCTCATGCACTTCA |
| Claudin-2                                | AAGTGCTGTCTCCCACTGAG | TGCCTCTCCAAAACAGTAGG |
| Claudin-3                                | AGAAGCGAGAGATGGGAAT  | GGTACATCGACGGTTGGTAG |
| Claudin-4                                | TATACCCCTCCCTCTTCAG  | ATGCAGGTGCCATTTATTGT |
| $\alpha$ -Defensin-related<br>sequence-1 | CAGGCTGATCCCATTCAAGA | GTGGACCTTGATAGCCGAAT |
| Defensin-5                               | TGCTCTGCTCTCCGTGATTA | AGTGCCTTTATCCCCTCAA  |
| Angiopoetin-4                            | ATGACAGCAGCATCTCAGCA | GCGGATGCCATTGATCTTAT |
| Lysozyme-2                               | GGTGAATGACGGCAAACC   | AGACTCCGCAGTTCCGAATA |

## Supplemental Information: Hemorrhagic shock-induced intestinal barrier dysfunction

**Table S2:** Primary antibodies used for immunoblotting assays described in the main text were obtained from Santa Cruz Biotechnology, Inc. (SCBT, Dallas, TX) and Cell Signaling Technology (CST, Danvers, MA).

| Protein                            | Antibody source and catalogue # | Dilution and application                            |
|------------------------------------|---------------------------------|-----------------------------------------------------|
| Zonula<br>Occludens-1              | SCBT, sc10804                   | 1:1000 immunoblotting<br>1:150 immunohistochemistry |
| Zonula<br>Occludens-2              | SCBT, sc11448                   | 1:1000 immunoblotting<br>1:500 immunohistochemistry |
| Occludin                           | SCBT, sc5562                    | 1:1000 immunoblotting<br>1:500 immunohistochemistry |
| Claudin-1                          | SCBT, sc17658                   | 1:1000 immunoblotting<br>1:400 immunohistochemistry |
| Ileal lipid-<br>binding<br>protein | SCBT, sc23994                   | 1:1000 immunoblotting<br>1:500 immunohistochemistry |
| CD163                              | SCBT, sc33560                   | 1:1000 immunoblotting                               |
| Phospho-<br>tyrosine               | SCBT, sc7020                    | 1 µg/100 µg total protein<br>immunoprecipitation    |
| Phospho-<br>threonine              | CST, 9381                       | 1 µg/100 µg total protein<br>immunoprecipitation    |
